14. Katz B: Nerve, Muscle and Synapse. New York, McGraw-Hill, 1966, p 125
15. Bhushan B, Kitz RJ, Hoskin FCG, et al: The effects of trichloroethylene on the peak transient (sodium) and steady state (potassium) conductivity of the squid giant axon. *Fed Proc* 33:713, 1973
16. Blaber LC, Christ DD: The action of facilitatory drugs on the isolated tenuissimus muscle of the cat. *Int J Neuropharmacol* 6:433-484, 1957
17. Adriani J, Rovenstine EA: The effect of anesthetic drugs on activity of cholinesterase. *Anesth Analg (Cleve)* 20:109, 1941
18. Miquel O: The effect of chloroform and ether on the activity of cholinesterase. *J Pharmacol* 88:190, 1946
19. Galindo A: Curare and pancuronium compared: Effects on previously undepressed mammalian myoneural junctions. *Science* 178:753-755, 1972
20. Ruch TC, Fulton JF: Medical Physiology and Biophysics. Philadelphia, W. B. Saunders, 1973, p 64
21. Waud BE, Cheng MC, Waud DR: Comparison of drug-receptor dissociation constants at the mammalian neuromuscular junction in the presence and absence of halothane. *J Pharmacol Exp Ther* 187:40-46, 1973
22. Van Poznak A: Inhalation anesthetic suppression of repetitive activity generated at motor nerve endings. *Fed Proc* 22:390, 1963
23. Van Poznak A: The effect of inhalation anesthetic on repetitive activity generated at motor nerve endings. *ANESTHESIOLOGY* 28:124-127, 1967
24. Van Poznak A, Artusio JR Jr: Neuromuscular effects of diethylether. *Fed Proc* 27:706, 1968
25. Gissen AJ, Karis JH, Nastuk WL: Effect of halothane on neuromuscular transmission. *JAMA* 197:116-120, 1966
26. Karis JH, Gissen AJ, Nastuk WL: Mode of action of diethyl ether in blocking neuromuscular transmission. *ANESTHESIOLOGY* 27:42-51, 1966
27. Karis JH, Gissen AJ, Nastuk WL: The effect of volatile anesthetic agents on neuromuscular transmission. *ANESTHESIOLOGY* 28:128-134, 1967

## Transfusion

**HEPATITIS B ANTIGEN** The effectiveness of various screening techniques for hepatitis B antigen (HBAg) was investigated in a prospective study of 82 patients. All blood given was negative for HBAG by the commonly used counterelectrophoresis test. Sixty-three patients received blood positive for HBAG when tested by erythrocyte agglutination (RCA) and/or solid-state radioimmunoassay (RIA). Nineteen control patients received individually equal amounts of HBAG-negative blood tested by RCA and RIA. Of the 63 patients, four became positive, and 13 produced evidence of antibody formation to

HBAG. Another 14 had clinical signs of hepatitis without detectable HBAG activity. In the 19-patient control group two persons developed HBAG activity and eight others contracted HBAG-negative clinical hepatitis. The authors conclude that both RCA and RIA methods of HBAG detection are superior to the common counterelectrophoresis technique and that RCA correlated more closely than RIA with the incidence of posttransfusion HBAG hepatitis. (Koretz R.L., and others: *Post-transfusion Hepatitis in Recipients of Blood Screened by Newer Assays. Lancet Sept:694-696, 1973.*)
